# Supplementary material
Source: Springer Nature journal article supplement (https://www.springermedizin.de/resource/supplementary/13075_2011_3196_MOESM2_ESM.pdf/9694008)

A.

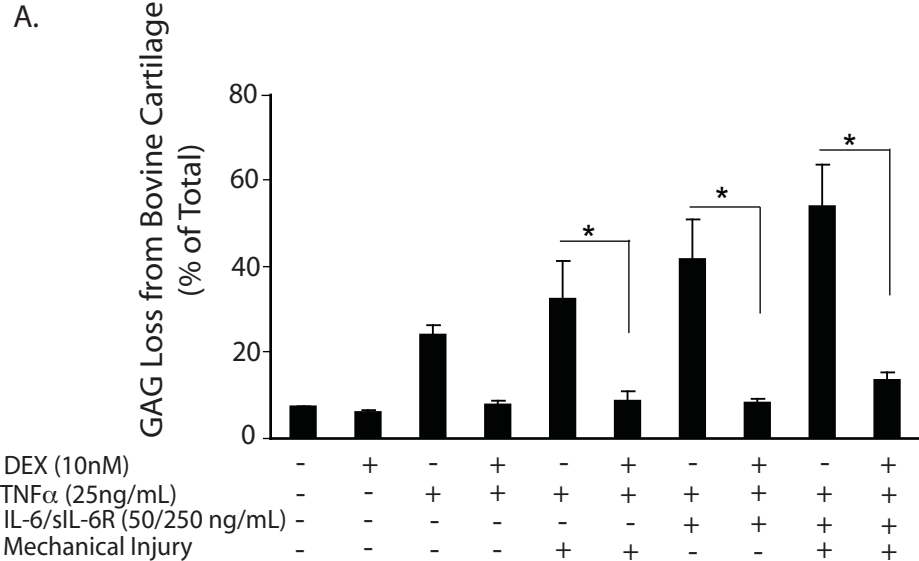

B.

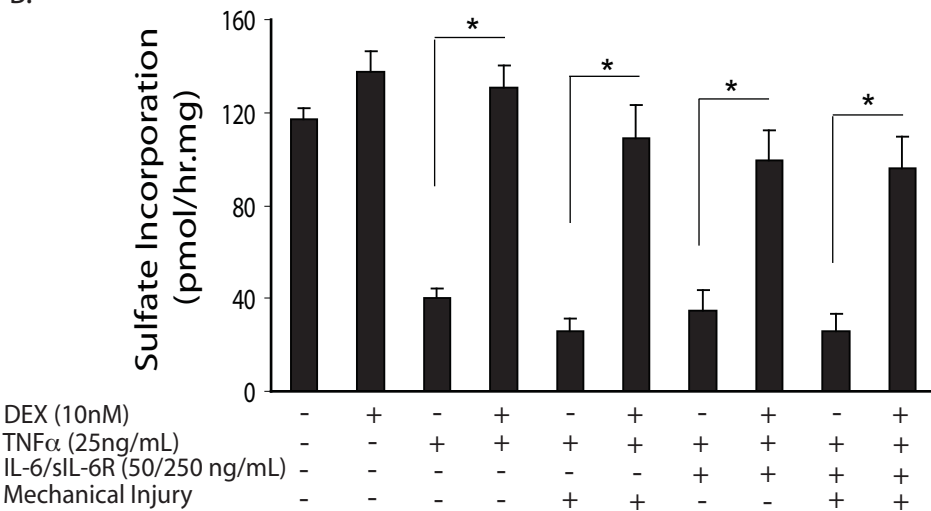

Supplement: MOESM2 [file 9694008]
